# Supplementary material for: Actinomycin analogs from soil-derived Streptomyces sp. PSU-S4-23 with activity against MRSA
Source: Research Square preprint supplement (doi:10.21203/rs.3.rs-7993493/v1), 2025-11-03
Supplement: Supplementary file 1 [file ffbf666517b67a9783c2eb68.docx]

**Supplementary data**

**Actinomycin analogs from soil-derived Streptomyces sp. PSU-S4-23 with activity against MRSA**

**Figure S1.** Neighbour-joining tree based on 16S rRNA gene sequences showing the relationship between strain PSU-S4-23 and other closely related *Streptomyces*. All positions containing gaps and missing data were eliminated. There were a total of 1389 positions in the final dataset. Bootstrap values (>50 %) based on 1000 replicates are shown at branch nodes. *Streptacidiphilus albus* JL 83T was used as the outgroup. Bar, 0.005 nucleotide substitution rate (Knuc) units.

**Figure S2.** Maximum-likelihood phylogenetic tree based on 16S rRNA gene sequences showing

the relationship between strain PSU-S4-23 and closely related *Streptomyces*. All positions containing gaps and missing data were eliminated. There were a total of 1389 positions in the final dataset. *Streptacidiphilus albus* JL 83T was used as an outgroup. Bootstrap values 50 % (based on 1000 replications) are shown at branch points. Bar, 0.005 substitutions per nucleotide position

**Figure S3.** Phylogenomic tree generated by autoMLST showing the relationship of strain PSU-S4-23 to related species within the genus *Streptomyces*.

**Figure S4**. Average Nucleotide Identity (ANI) heatmap and clustering of *Streptomyces* genomes.

**Figure S5**. Digital DNA–DNA hybridization (dDDH) heatmap among *Streptomyces* genomes.

**Table S1.** Comparative analysis of the BGC Cluster 20 in PSU-S4-23 and the actinomycin D cluster (BGC0000296).

**
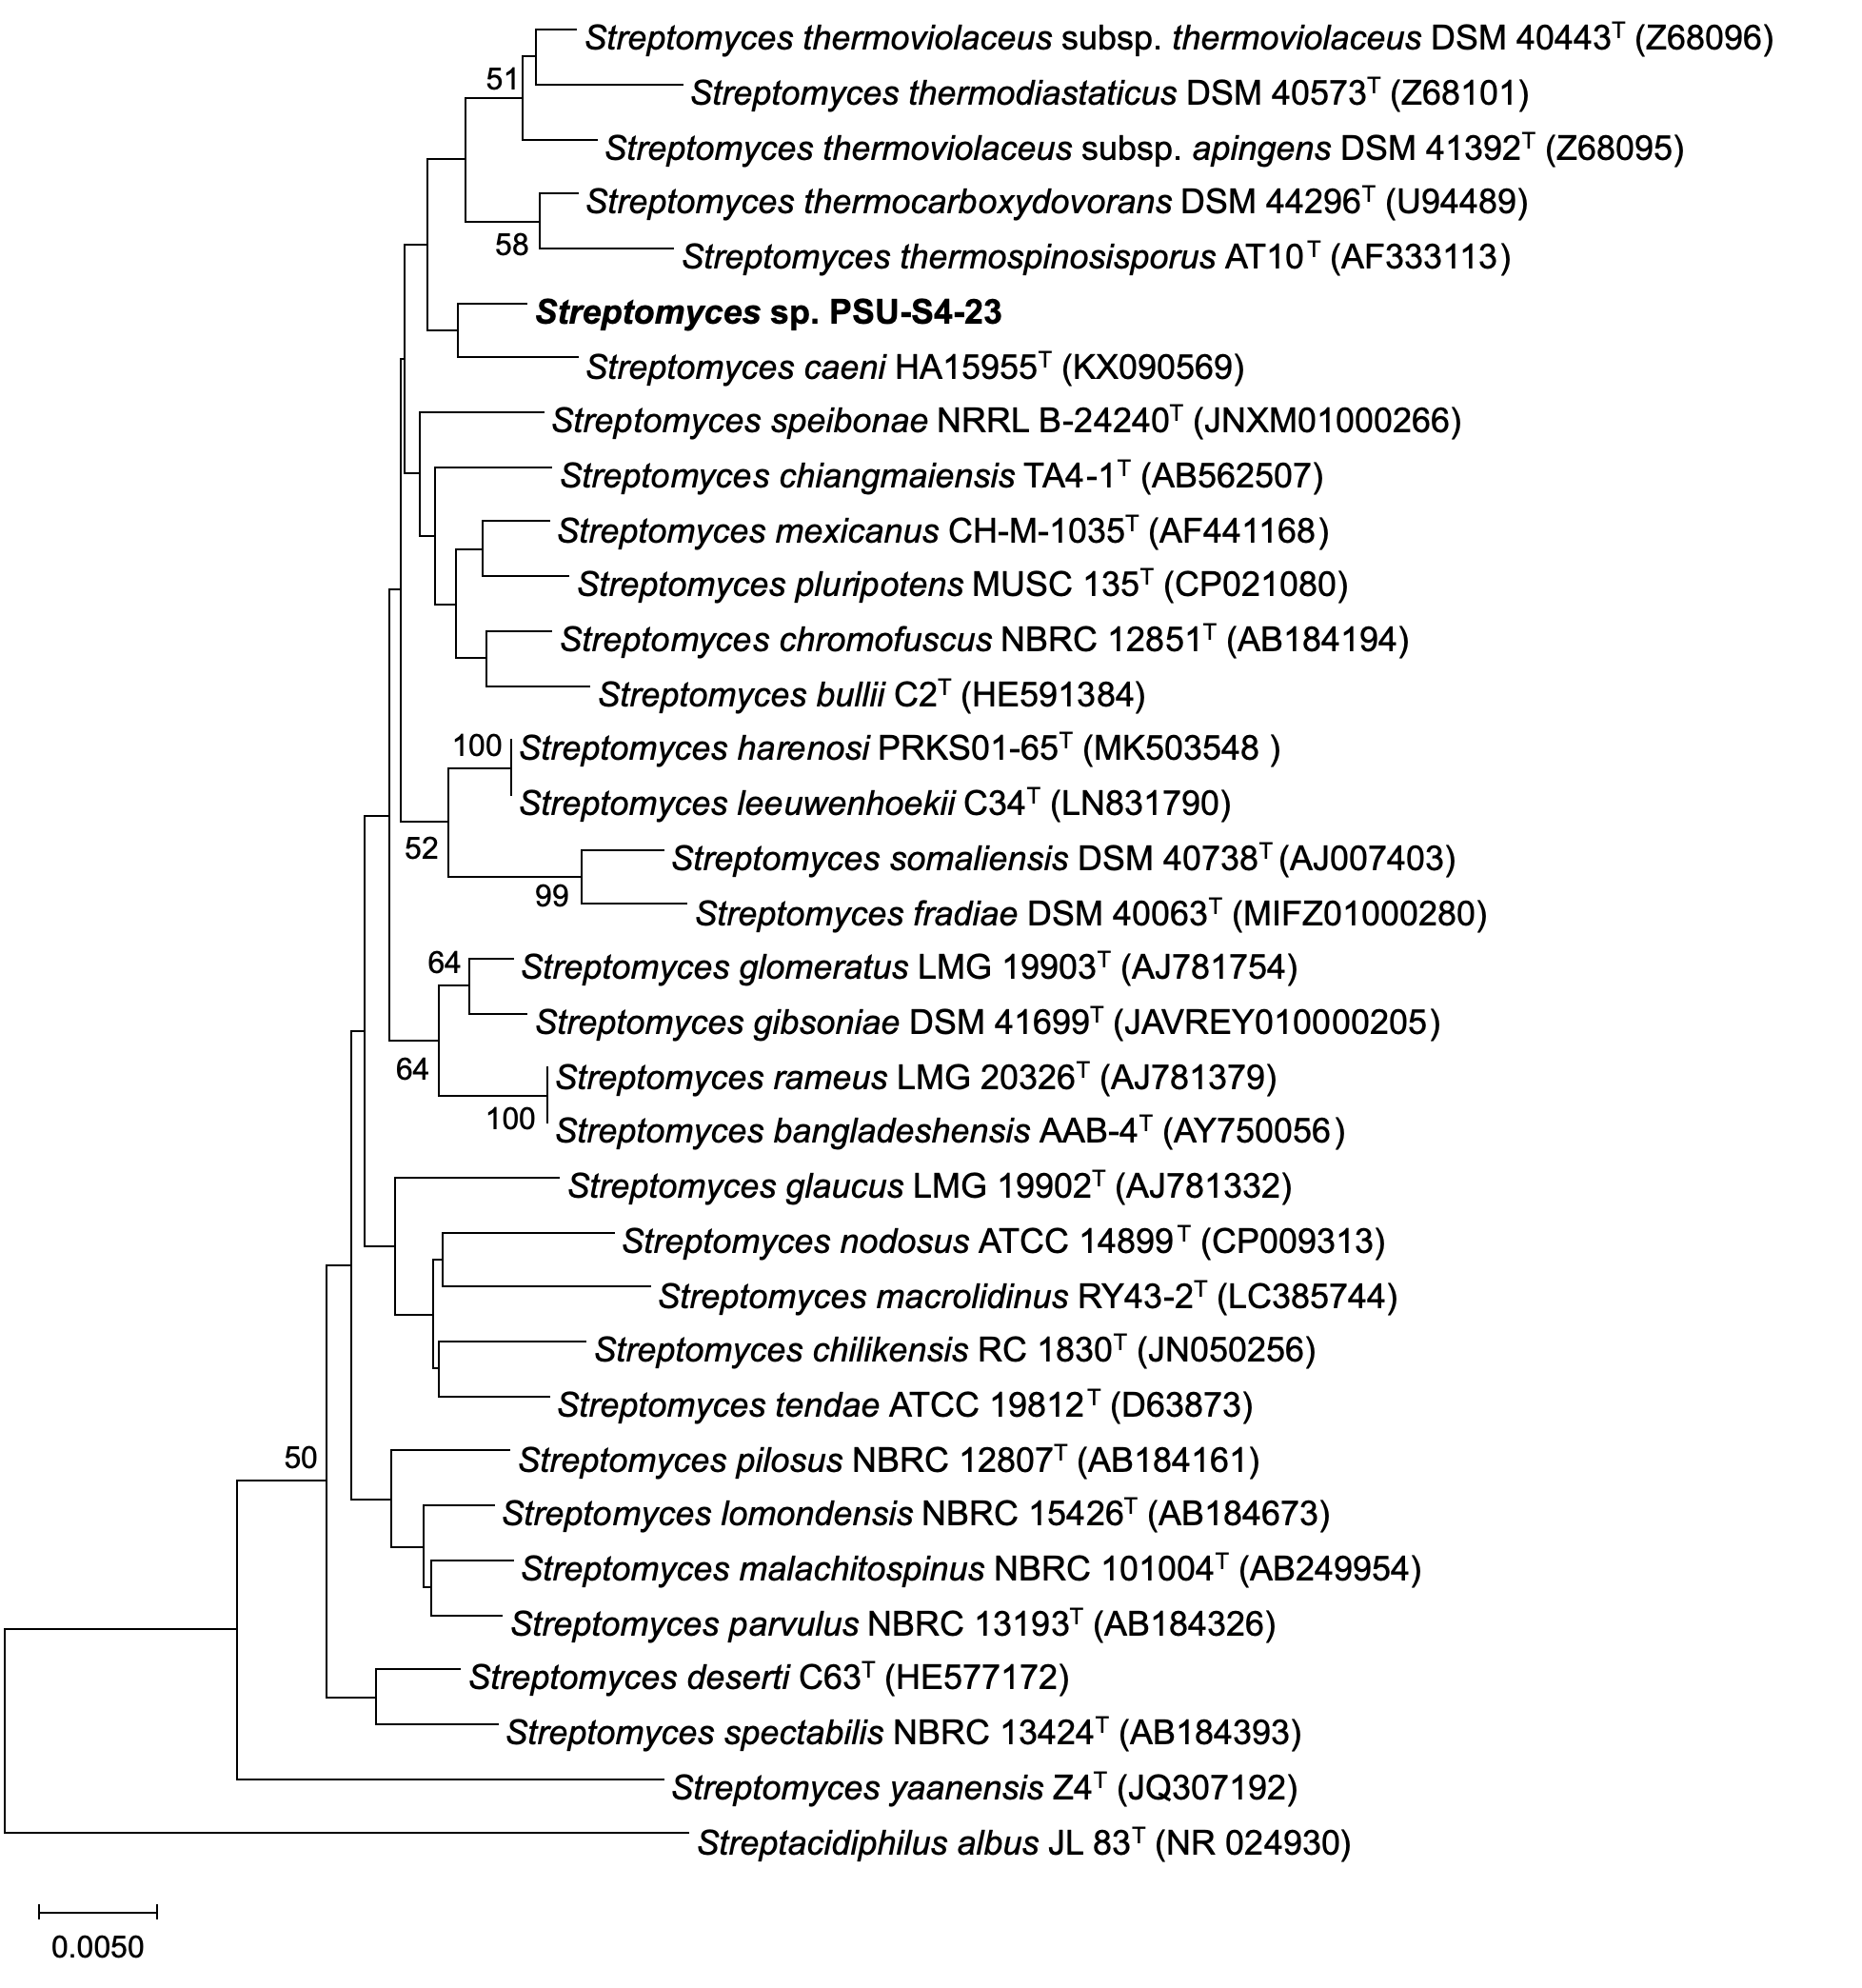
**

**Figure S1.** Neighbour-joining tree based on 16S rRNA gene sequences showing the relationship between strain PSU-S4-23 and other closely related *Streptomyces*. All positions containing gaps and missing data were eliminated. There were a total of 1389 positions in the final dataset. Bootstrap values (>50 %) based on 1000 replicates are shown at branch nodes. *Streptacidiphilus albus* JL 83T was used as the outgroup. Bar, 0.005 nucleotide substitution rate (Knuc) units.

**
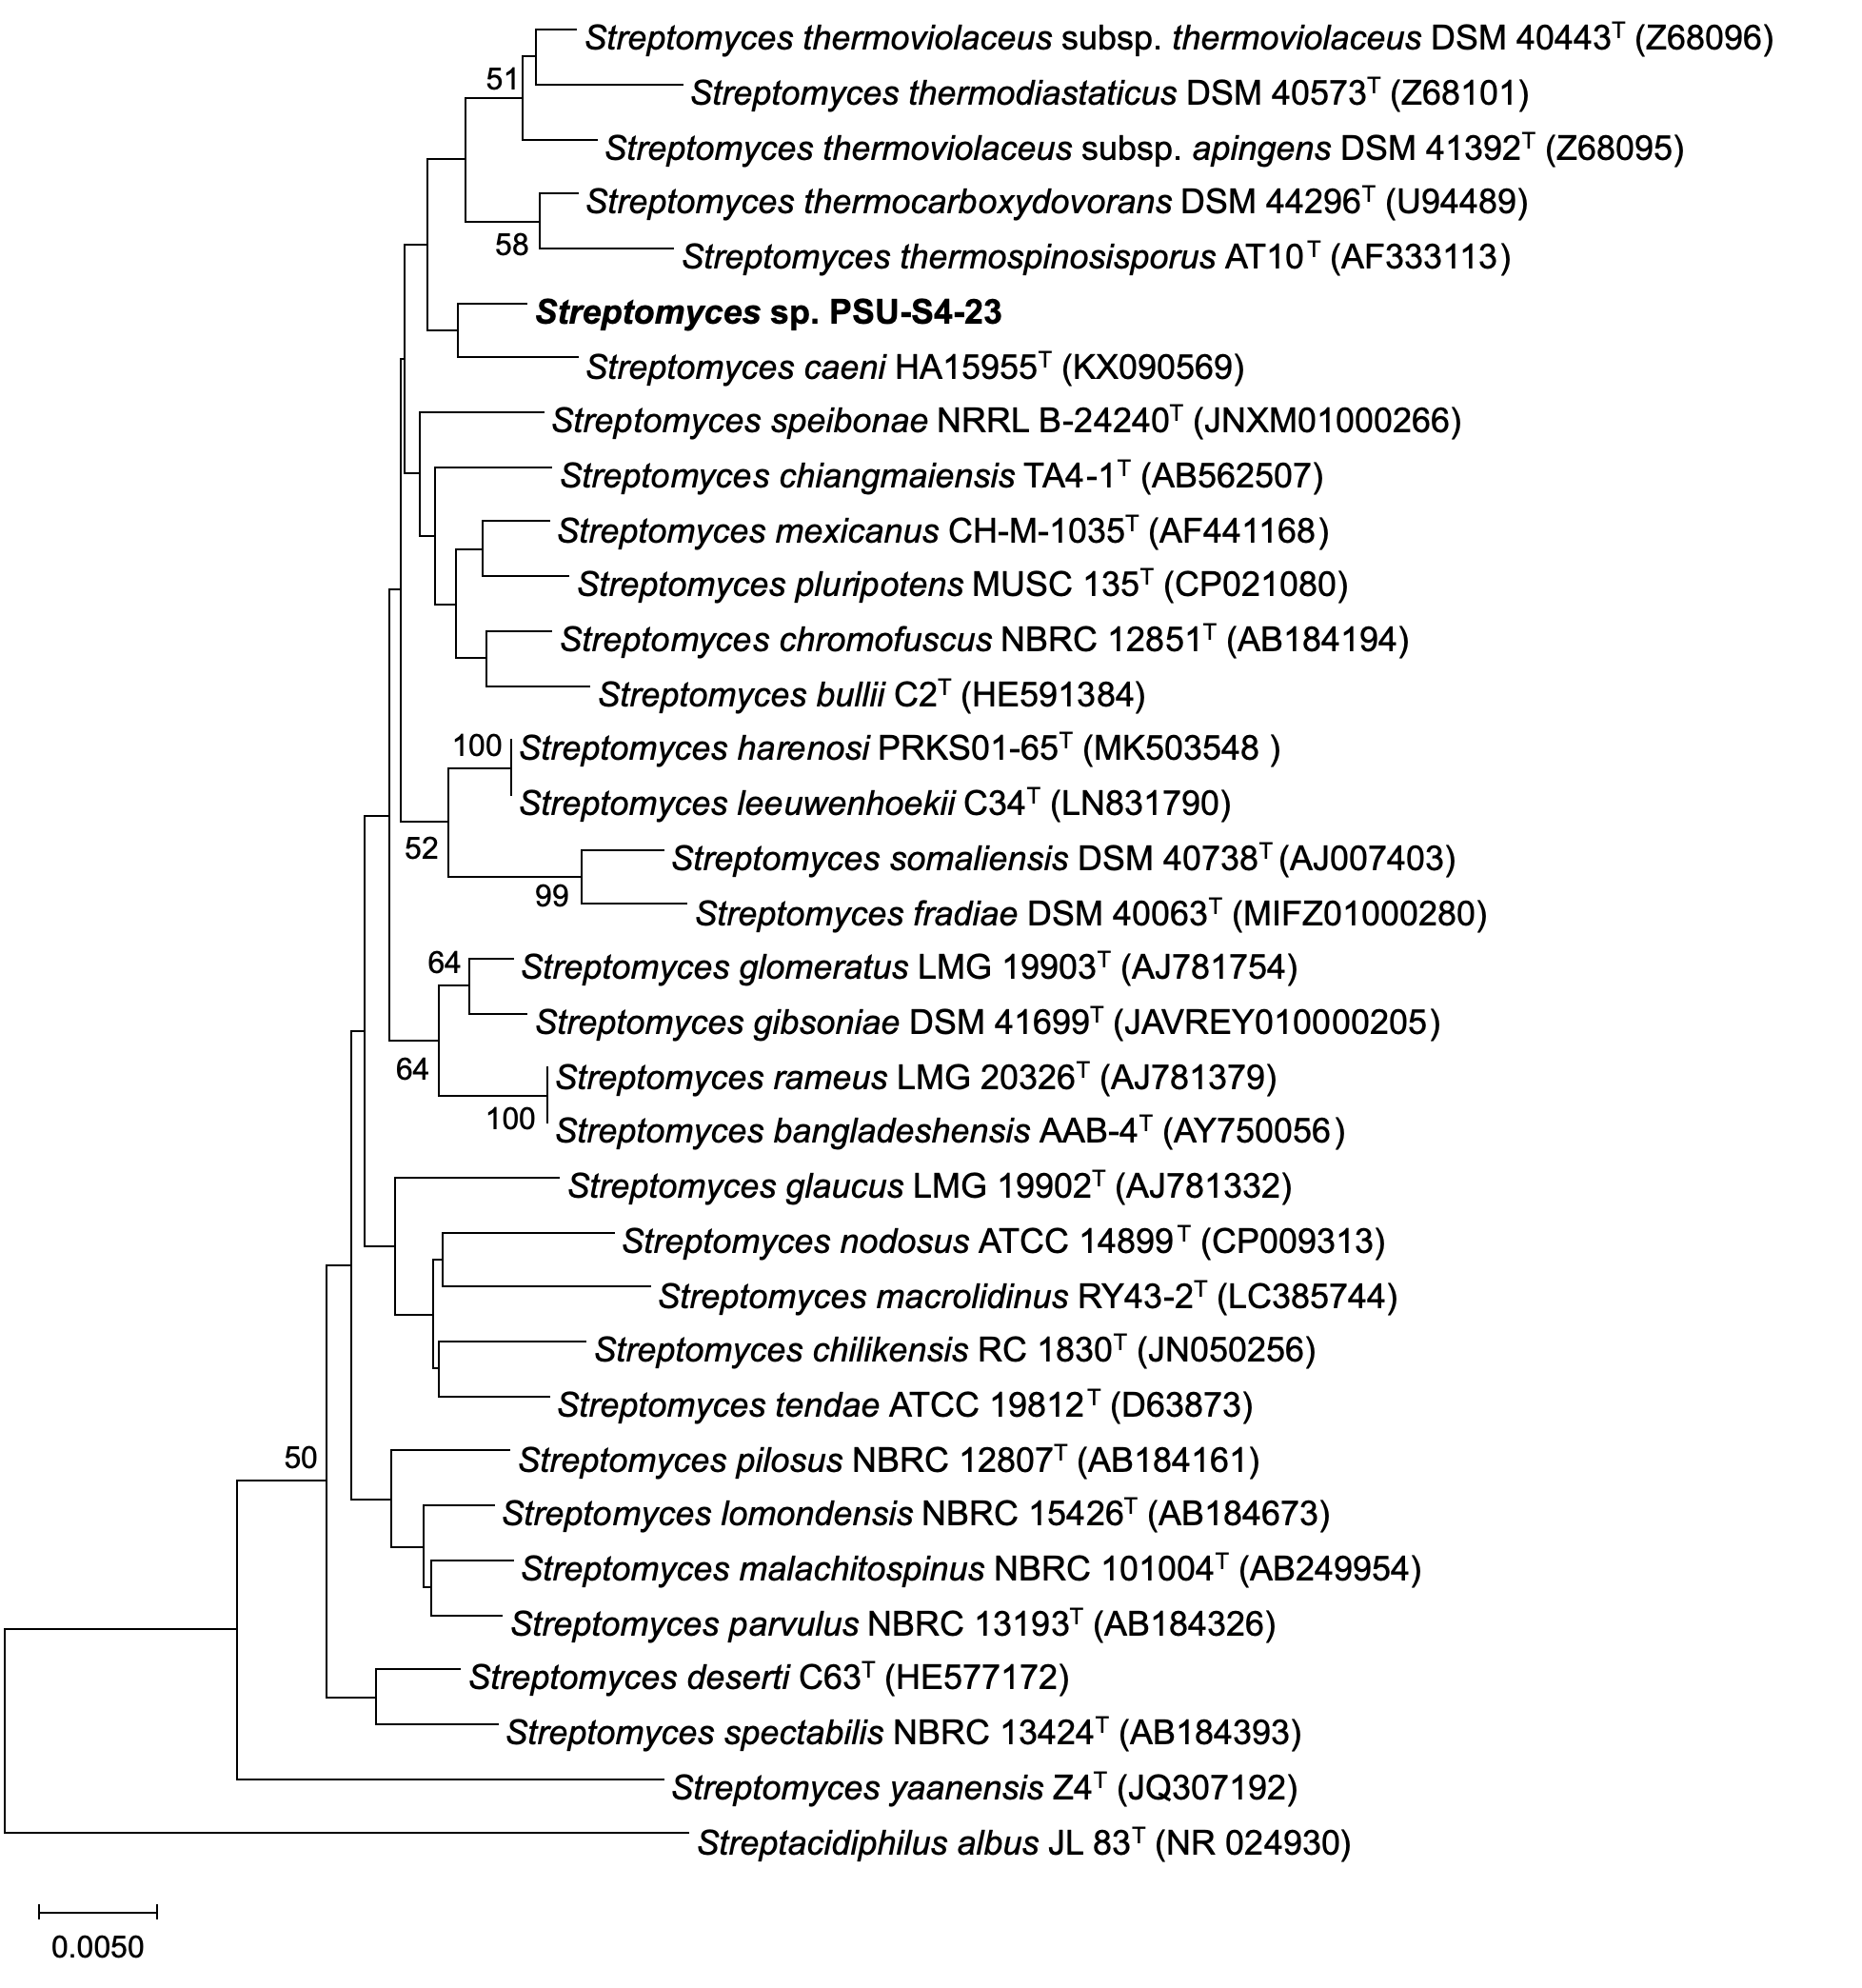
**

**Figure S2.** Maximum-likelihood phylogenetic tree based on 16S rRNA gene sequences showing

the relationship between strain PSU-S4-23 and closely related *Streptomyces*. All positions containing gaps and missing data were eliminated. There were a total of 1389 positions in the final dataset. *Streptacidiphilus albus* JL 83T was used as an outgroup. Bootstrap values 50 % (based on 1000 replications) are shown at branch points. Bar, 0.005 substitutions per nucleotide position

**
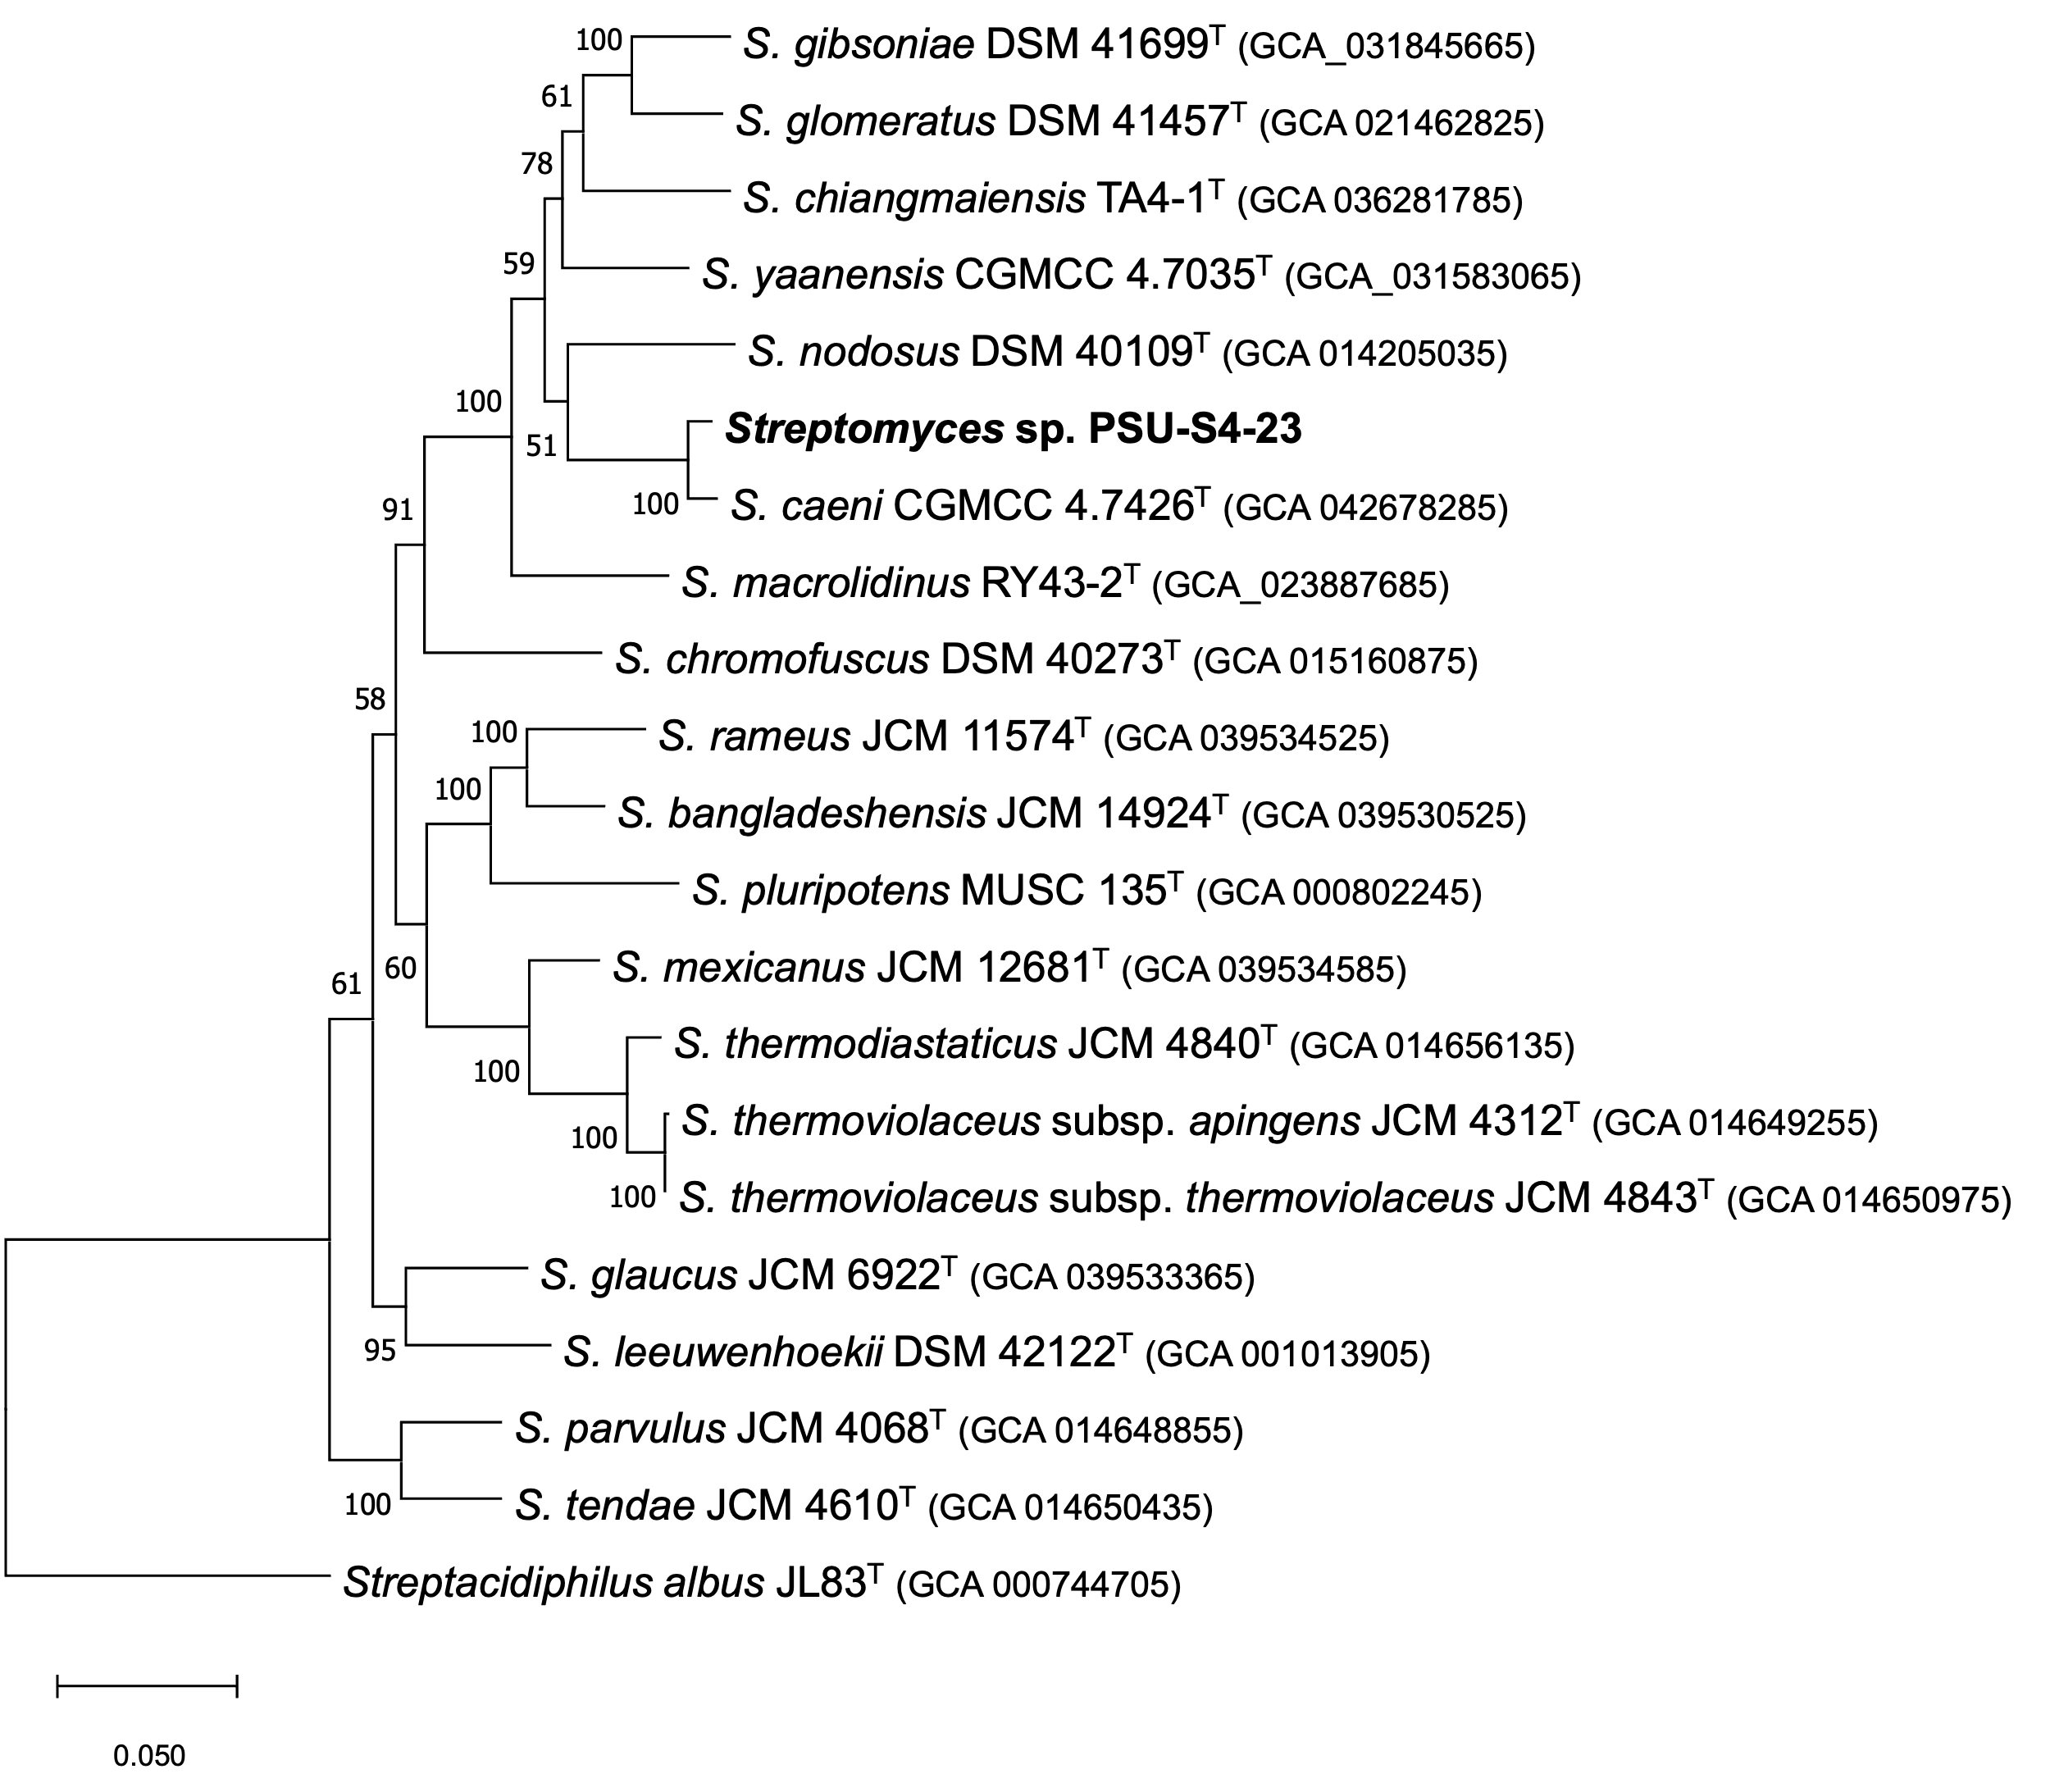
**

**Figure S3.** Phylogenomic tree generated by autoMLST showing the relationship of strain PSU-S4-23 to related species within the genus *Streptomyces*.


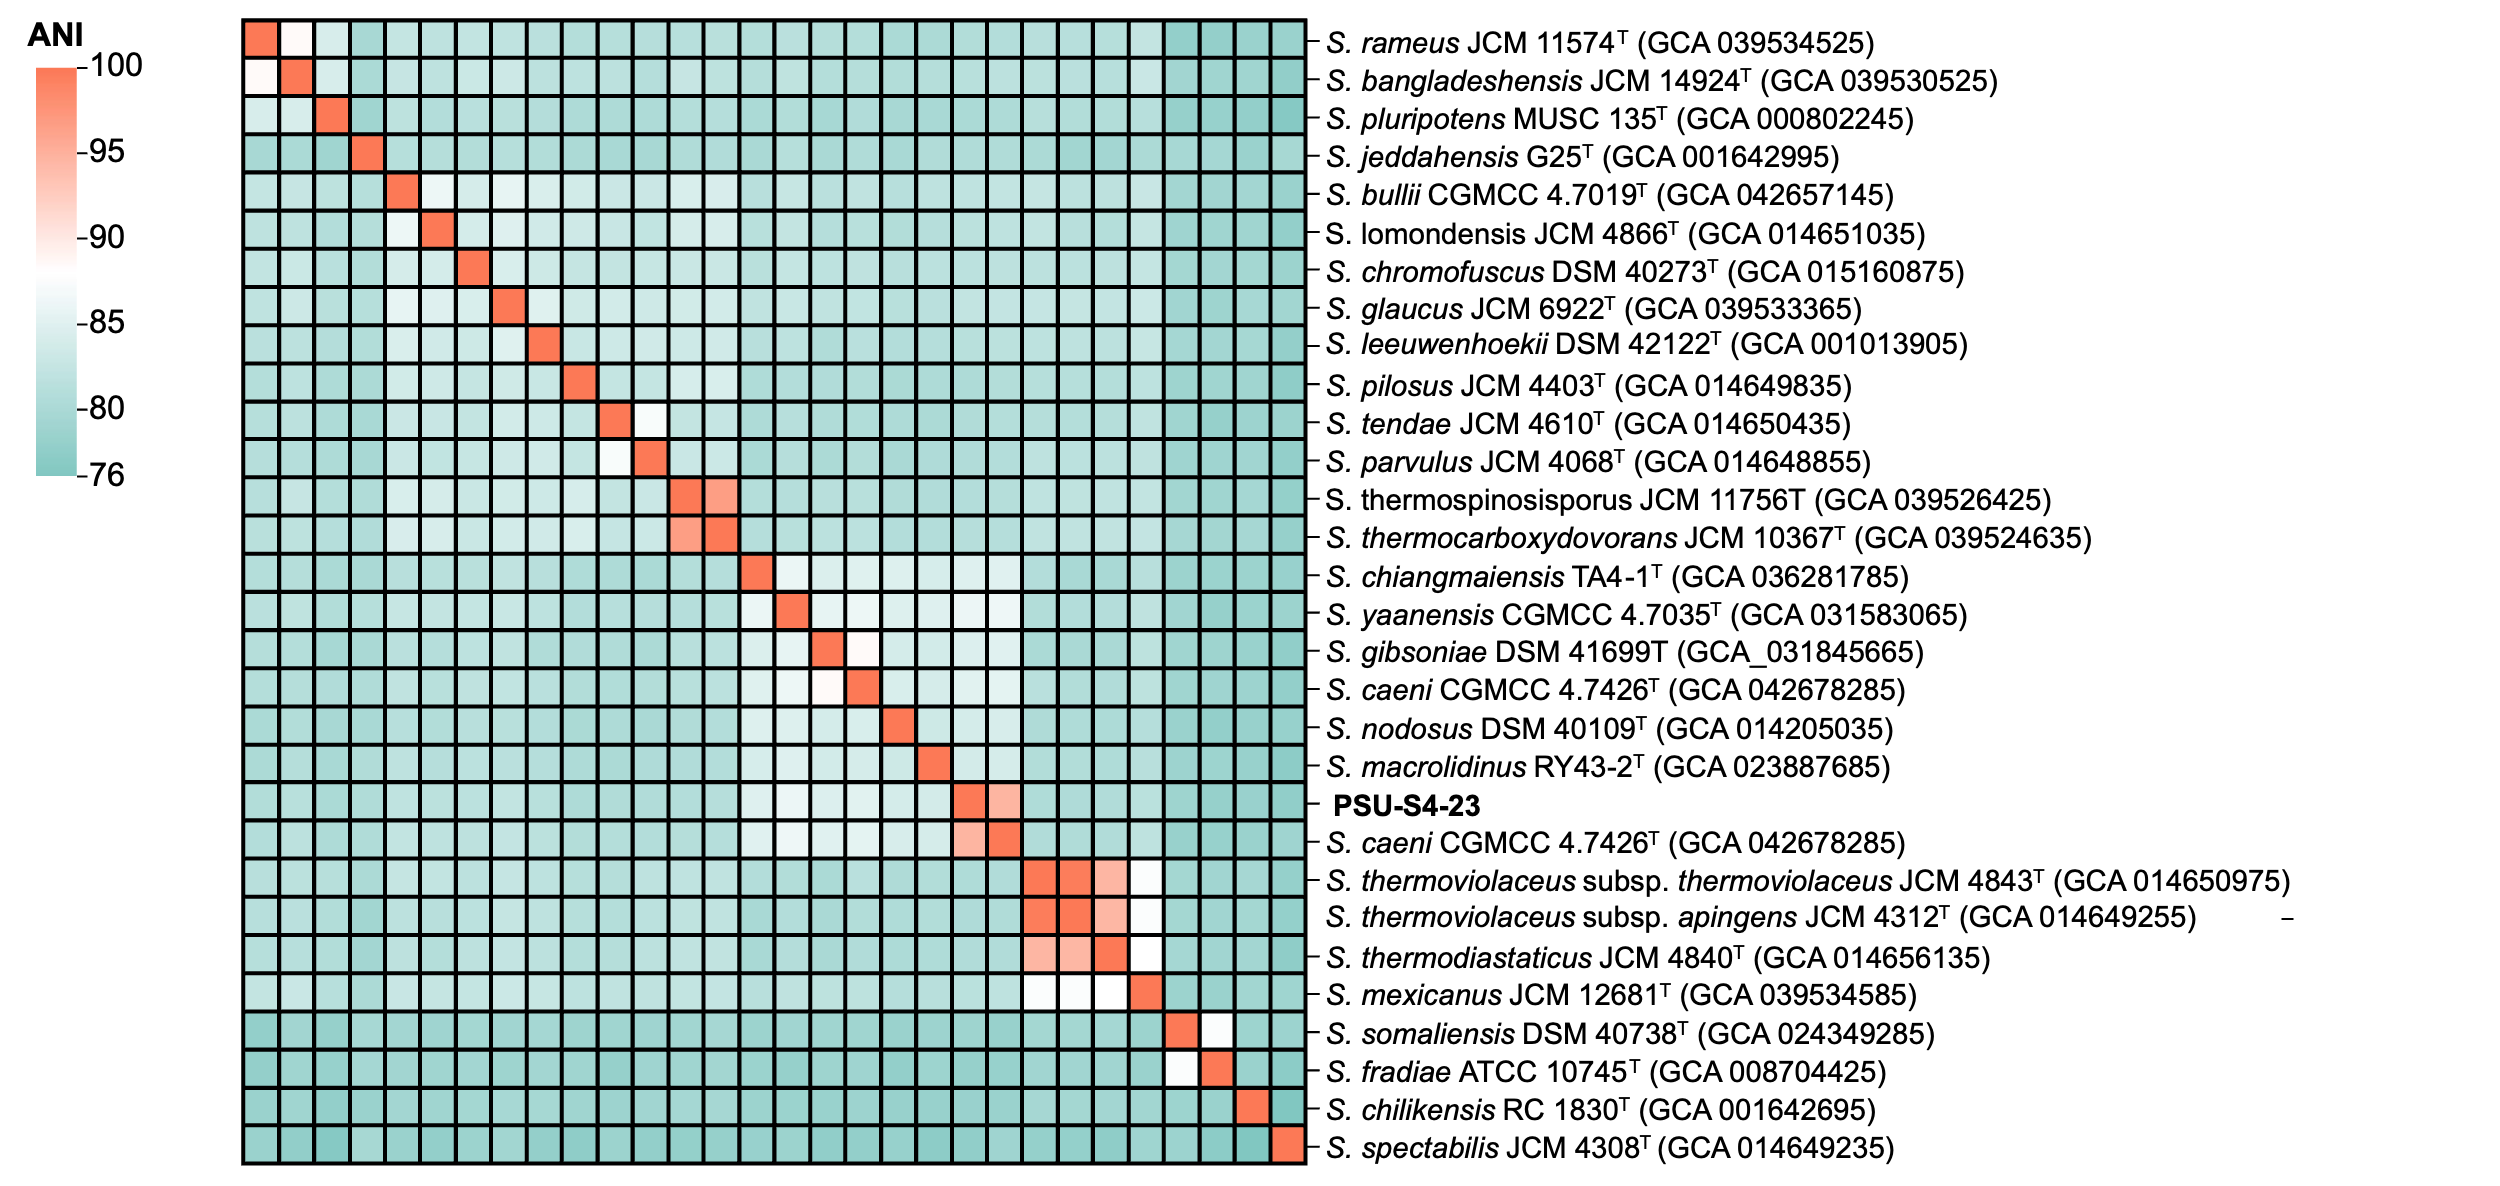


**Figure S4**. Average Nucleotide Identity (ANI) heatmap and clustering of *Streptomyces* genomes.


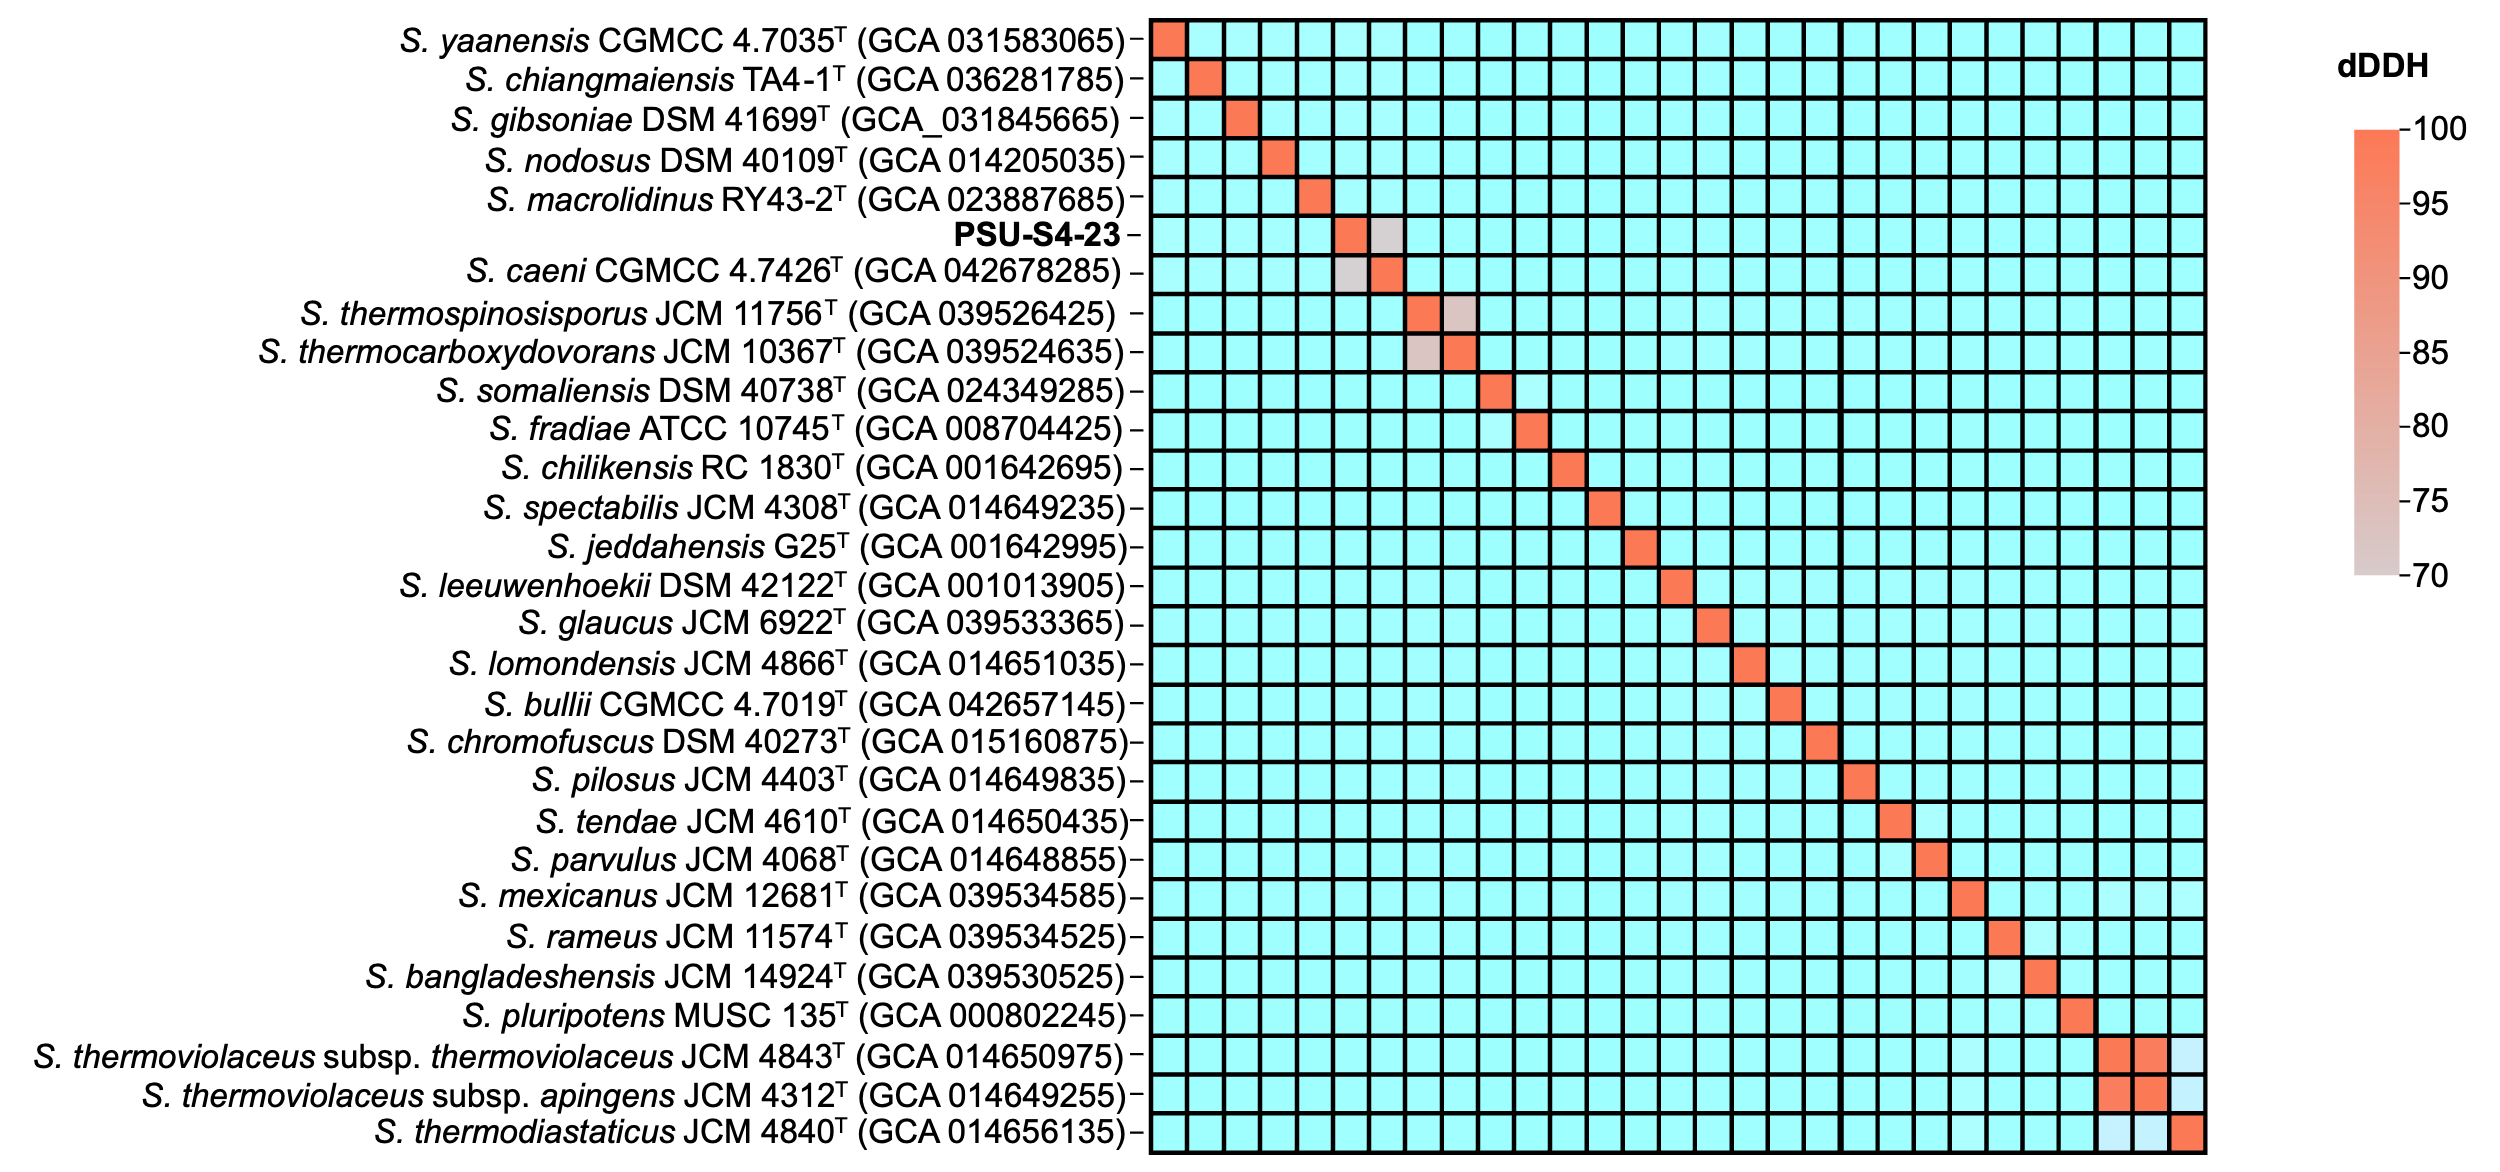


**Figure S5**. Digital DNA–DNA hybridization (dDDH) heatmap among *Streptomyces* genomes.

**Table S1.** Comparative analysis of the BGC Cluster 20 in PSU-S4-23 and the actinomycin D cluster (BGC0000296).

| **PSU-S4-23 BGC cluster 20** | | | | | **Actinomycin D BGC (BGC0000296)** | | | | | | **Amino-acid identity (%)** |
| --- | --- | --- | --- | --- | --- | --- | --- | --- | --- | --- | --- |
| **locus** | **start** | **end** | **strand** | **Amino-acid length** | **locus** | **start** | **end** | **strand** | **Amino-acid length** | **BGC product** |
| **ctg2_6390** | 5573 | 5920 | + | 115 | orf120 | 47456 | 47818 | - | 120 | transposase | 35.8 |
| **ctg2_6398** | 14798 | 15289 | - | 163 | orf157 | 47962 | 48435 | - | 157 | transposase | 37.4 |
| **ctg2_6401** | 16299 | 16931 | - | 210 | acmT | 11598 | 12233 | - | 211 | hypothetical protein | 73.5 |
| **ctg2_6402** | 16928 | 17491 | - | 187 | acmS | 12244 | 12804 | - | 186 | unknown | 73.8 |
| **ctg2_6403** | 17501 | 17701 | - | 66 | acmR | 12817 | 13017 | - | 66 | MbtH-like protein | 78.8 |
| **ctg2_6404** | 17747 | 17983 | - | 78 | acmD | 13084 | 13320 | - | 78 | 4-MHA carrier protein | 71.8 |
| **ctg2_6405** | 17980 | 19383 | - | 467 | acmA | 13317 | 14735 | - | 472 | peptide synthetase | 72.7 |
| **ctg2_6406** | 20001 | 27827 | + | 2608 | acmB | 15166 | 23001 | + | 2611 | peptide synthetase | 73.6 |
| **ctg2_6407** | 27824 | 40537 | + | 4237 | acmC | 22998 | 35741 | + | 4247 | peptide synthetase | 77.7 |
| **ctg2_6408** | 40609 | 41238 | + | 209 | acmE | 35738 | 36445 | + | 235 | hypothetical protein | 70.2 |
| **ctg2_6409** | 41243 | 42136 | + | 297 | acmF | 36480 | 37394 | + | 304 | aryl formamidase | 79.3 |
| **ctg2_6410** | 42133 | 42975 | + | 280 | acmG | 37391 | 38233 | + | 280 | tryptophan 2,3-dioxygenase | 77.1 |
| **ctg2_6411** | 43048 | 44310 | + | 420 | acmH | 38294 | 39556 | + | 420 | kynureninase | 81.4 |
| **ctg2_6412** | 44363 | 45403 | + | 346 | acmL | 9455 | 10495 | - | 346 | methyltransferase | 97.4 |
| **ctg2_6415** | 47031 | 47678 | - | 215 | acmO | 7181 | 7828 | + | 215 | LbmU-like protein | 89.8 |
| **ctg2_6416** | 47905 | 48747 | - | 280 | acmP | 6112 | 6954 | + | 280 | TetR family transcriptional regulator | 93.2 |
| **ctg2_6417** | 48863 | 49747 | + | 294 | acmQ | 5113 | 5997 | - | 294 | siderophore-interacting protein | 96.6 |
| **ctg2_6418** | 49734 | 50810 | + | 358 | acmrA | 4050 | 5033 | - | 327 | ABC transporter ATPase subunit | 88.0 |
| **ctg2_6419** | 50800 | 51567 | + | 255 | acmrB | 3293 | 4060 | - | 255 | ABC 2-type transporter | 97.3 |
| **ctg2_6420** | 51654 | 53924 | + | 756 | acmrC | 936 | 3206 | - | 756 | UrvA-like protein | 96.6 |
